# Supplementary material for: Modeling of a focused Gaussian beam into multi-layered tissue with Monte Carlo simulation
Source: MDPI journal article supplement (doi:10.3390/pharmaceutics14020453), 2004-01-01
Supplement: s1 [file s1]

## Supplementary Material

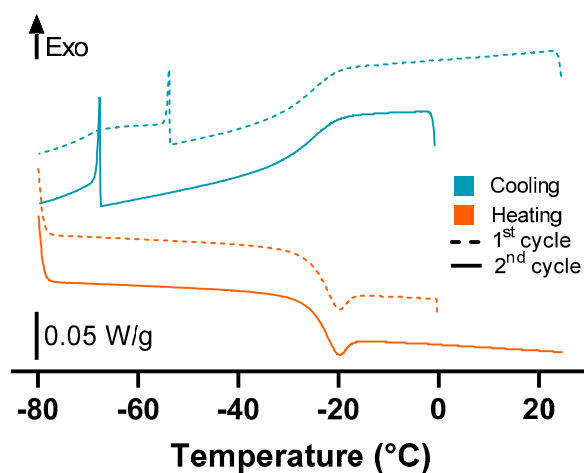

**Figure S1.** DSC thermograms of two cooling/heating cycles performed on the same travoprost sample, displaying thermal reversibility of the event of interest (Cooling/Heating rate of 5 °C/min, before heating the sample was annealed at -80 °C for 3 minutes). Displayed thermograms were shifted for clarity.

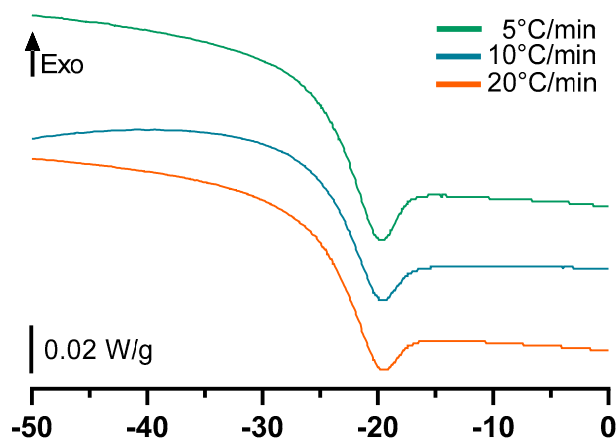

**Figure S2.** DSC Thermograms focusing on the glass transition with relaxation event displayed when heating travoprost at a 5 °C/min after a cooling at 5, 10 or 20 °C/min from ambient temperature to -80 °C followed by an annealing at -80°C for 3 minutes. Displayed thermograms were shifted for clarity.

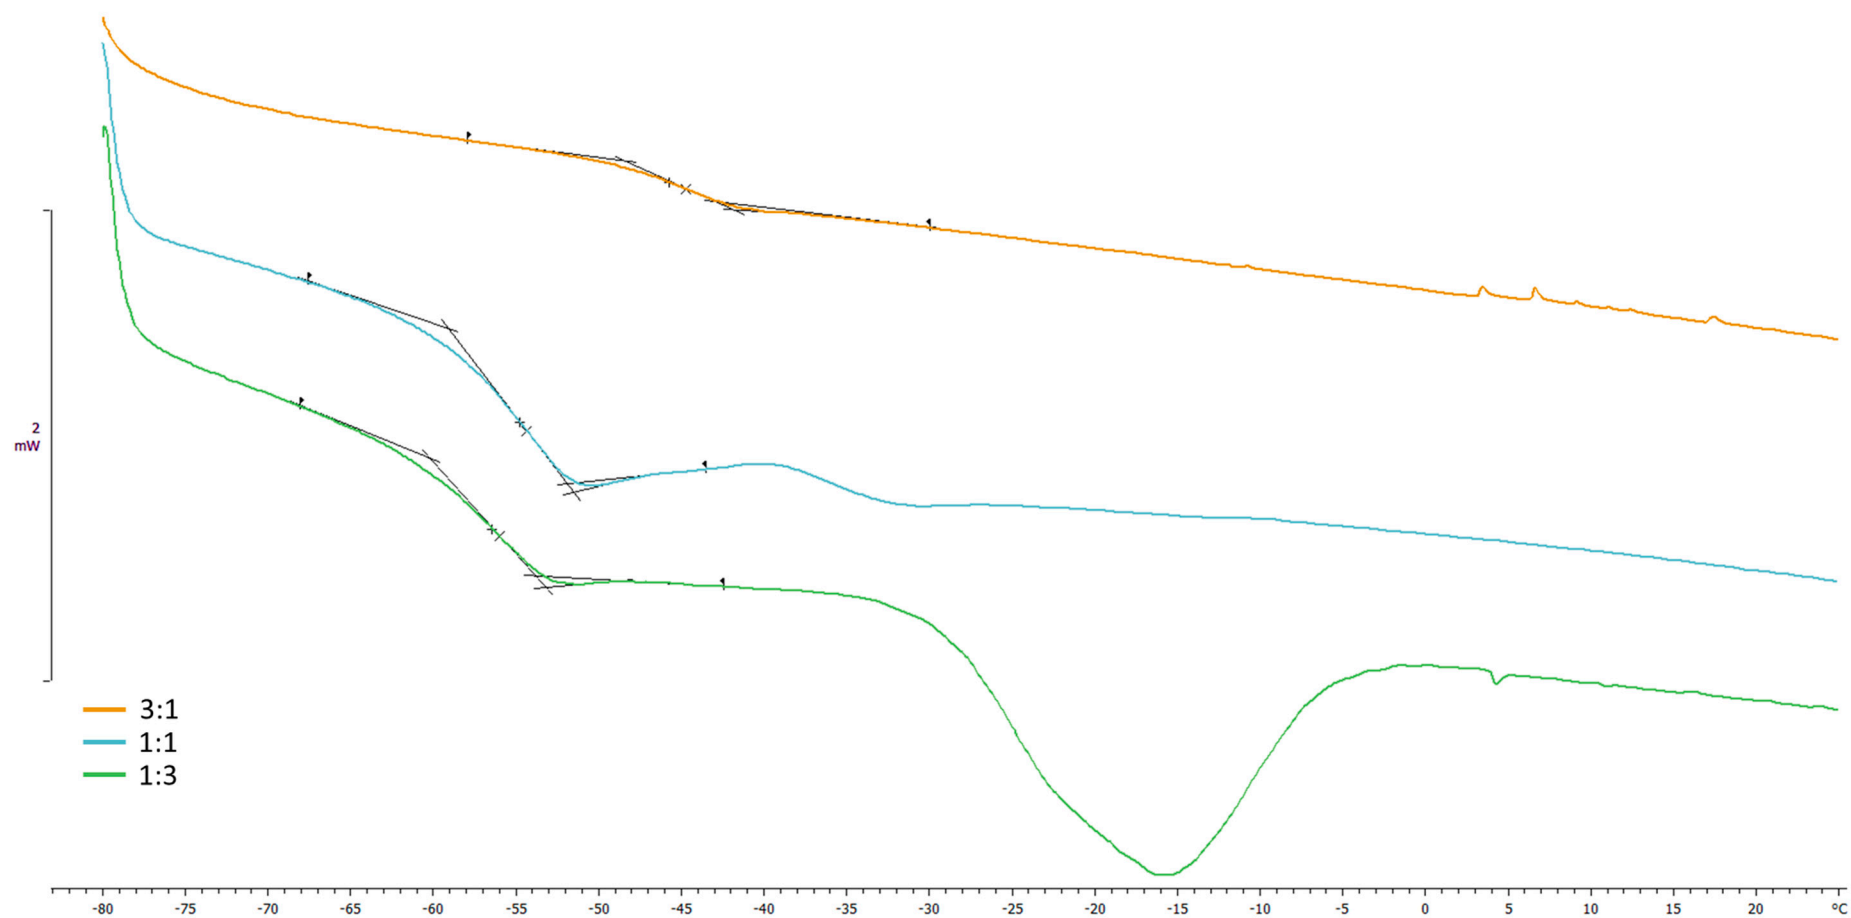

**Figure S3** Illustration of thermal event integration applying the “parallel tangents method” to thermograms of different travoprost:PS80 weight ratios, namely 3:1 (top curve), 1:1 (middle curve) and 1:3 (bottom curve).
